# Supplementary material for: Carboxylate engineering for manipulating the optical and assembly properties of copper clusters
Source: Royal Society of Chemistry journal article supplement (doi:10.1039/d3qi00409k), 2023-01-01
Supplement: d3qi00409k1.pdf [file d3qi00409k1.pdf]

## Electronic Supplementary Material

### Carboxylate Engineering for Manipulating Optical and Assembly

#### Properties of Copper Clusters

Jing Sun,<sup>1,2,+</sup> Fang Sun,<sup>5+</sup> Jiaqi Tang,<sup>3,+</sup> Xiongkai Tang,<sup>4,+</sup> Qingyuan Wu,<sup>4</sup> Rong Huo,<sup>1</sup> Ayisha He,<sup>1</sup> Sachurilatu,<sup>1</sup> Xueli Sun,<sup>1</sup> Chaolumen,<sup>2,\*</sup> Qing Tang,<sup>5,\*</sup> Hui Shen<sup>1,\*</sup>

<sup>1</sup> College of Energy Materials and Chemistry, Inner Mongolia University, Hohhot 010021, China.  
Email: shen@imu.edu.cn.

<sup>2</sup> College of Chemistry and Chemical Engineering, Inner Mongolia University, Hohhot 010021, China. Email: chaolumen@imu.edu.cn

<sup>3</sup> CAS Center for Excellence in Nanoscience, Beijing Key Laboratory of Micro-nano Energy and Sensor, Beijing Institute of Nanoenergy and Nanosystems, Chinese Academy of Sciences, Beijing, 101400, China

<sup>4</sup> State Key Laboratory of Physical Chemistry of Solid Surfaces and College of Chemistry and Chemical Engineering, Xiamen University, Xiamen, 361005, China

<sup>5</sup> School of Chemistry and Chemical Engineering, Chongqing Key Laboratory of Theoretical and Computational Chemistry Chongqing University, Chongqing, 401331, China

<sup>+</sup> These authors contribute equally to this work.

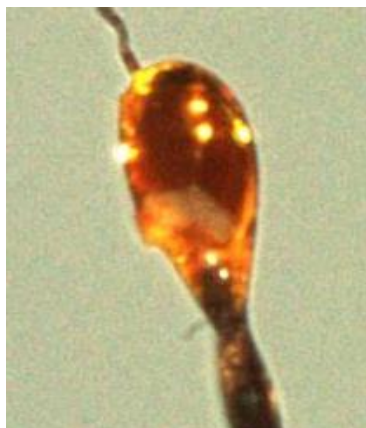

**Figure S1.** Digital photographs of single crystals of Cu<sub>14</sub>-1 cluster.

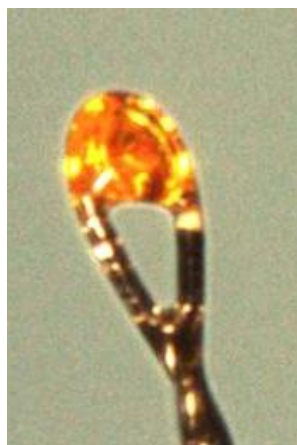

**Figure S2.** Digital photographs of single crystals of Cu<sub>14</sub>-2 cluster.

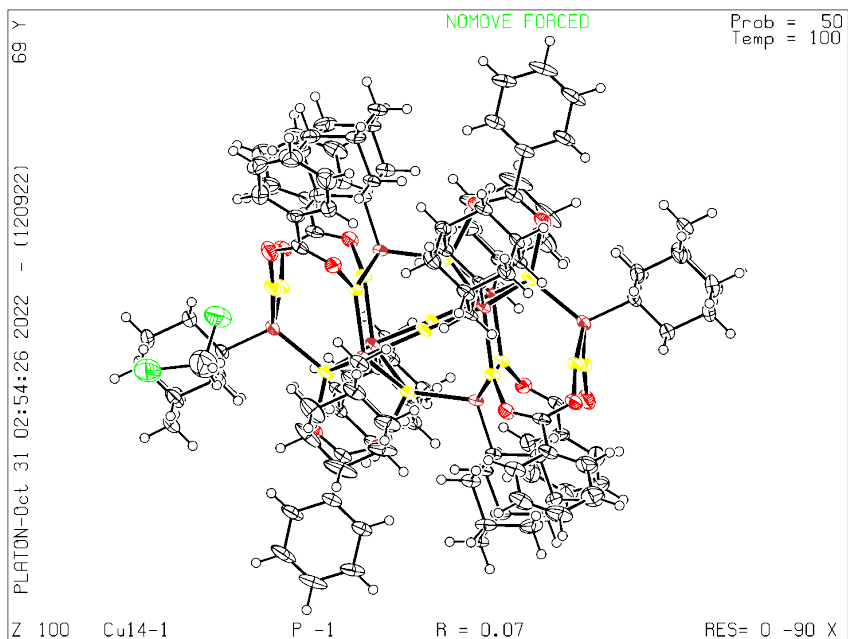

**Figure S3.** The thermal ellipsoids of the ORTEP diagram of Cu<sub>14</sub>-1 cluster.

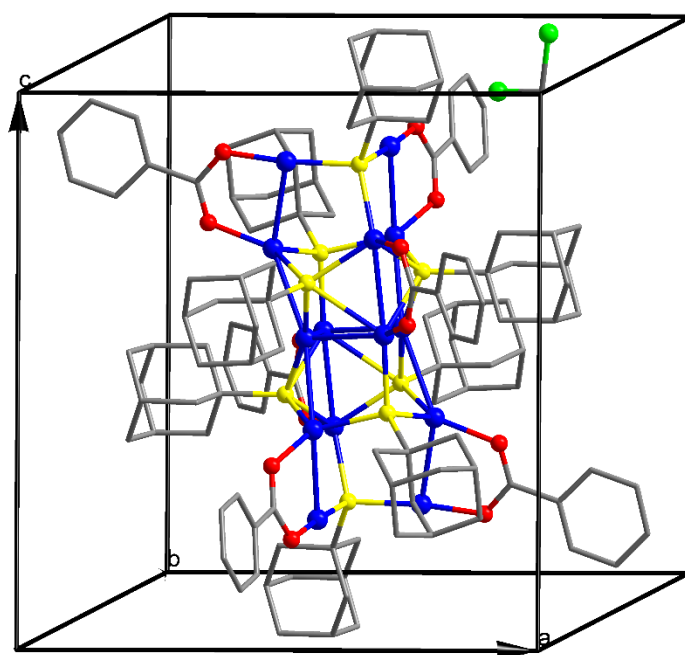

**Figure S4.** The packing structure of Cu<sub>14</sub>-1 in the unit cell. Color codes for atoms: blue spheres, Cu; yellow spheres, S; green spheres, Cl; grey spheres, C. All hydrogen atoms are omitted for clarity.

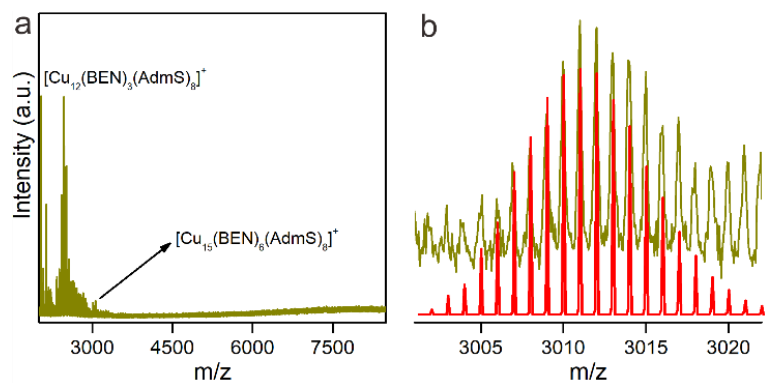

**Figure S5.** (a) ESI-MS of Cu<sub>14</sub>-1 in the positive mode. (b) The observed (dark yellow trace) and simulated (red trace) isotopic patterns of molecular ion peak of [Cu<sub>15</sub>(BEN)<sub>6</sub>(AdmS)<sub>8</sub>]<sup>+</sup>.

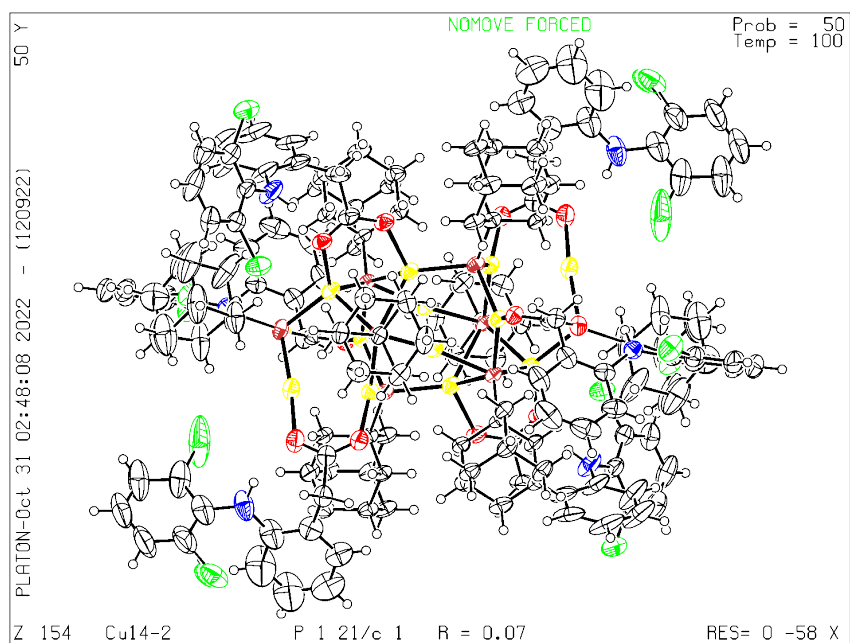

**Figure S6.** The thermal ellipsoids of the ORTEP diagram of Cu<sub>14</sub>-2 cluster.

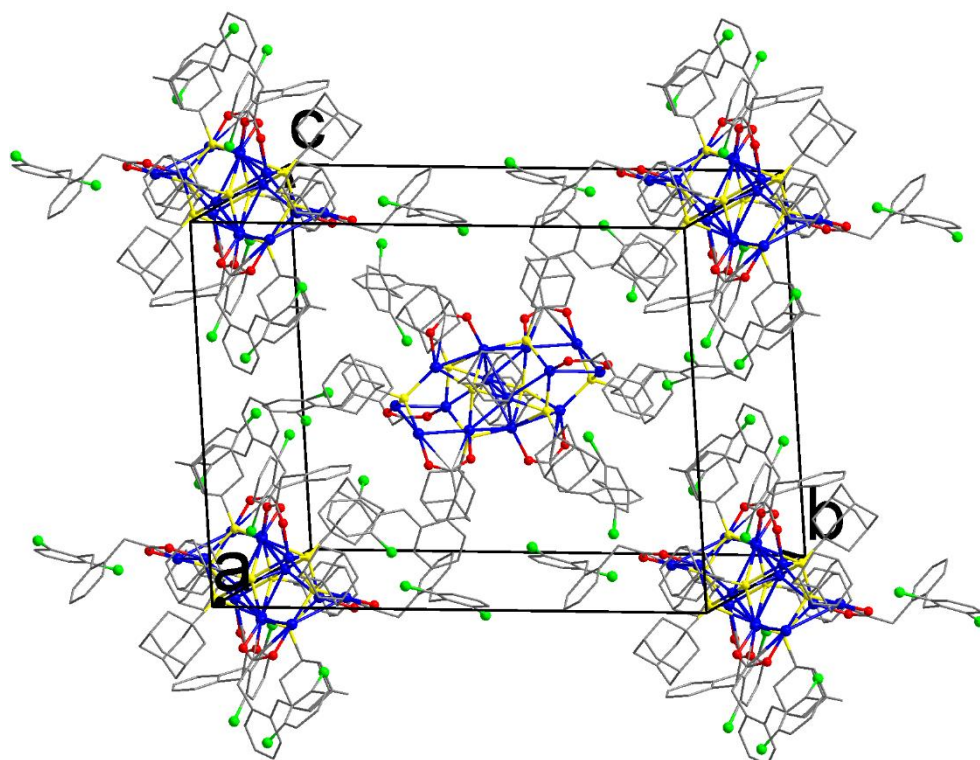

**Figure S7.** The packing structure of Cu<sub>14</sub>-2 in the unit cell. Color codes for atoms: blue spheres, Cu; yellow spheres, S; green spheres, Cl; grey spheres, C. All hydrogen atoms are omitted for clarity.

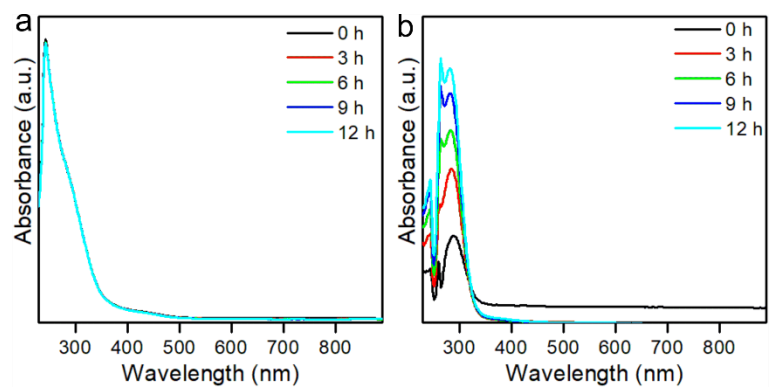

**Figure S8.** Time-dependent UV spectra of Cu<sub>14</sub> clusters at room temperature. (a) Cu<sub>14</sub>-1. (b) Cu<sub>14</sub>-2. Note: the samples were stored in air in the dark.

**Table S1.** Crystallographic data of Cu<sub>14</sub>-1.

|                                                                                |                                                                                                   |
|--------------------------------------------------------------------------------|---------------------------------------------------------------------------------------------------|
| identification code                                                            | Cu <sub>14</sub> -1                                                                               |
| formula                                                                        | C <sub>124</sub> H <sub>154</sub> C <sub>14</sub> Cu <sub>14</sub> O <sub>12</sub> S <sub>8</sub> |
| formula weight                                                                 | 3124.30                                                                                           |
| Temperature/K                                                                  | 100.01(10)                                                                                        |
| crystal system                                                                 | triclinic                                                                                         |
| space group                                                                    | <i>P</i> 1                                                                                        |
| <i>a</i> (Å)                                                                   | 14.9570(4)                                                                                        |
| <i>b</i> (Å)                                                                   | 15.1113(4)                                                                                        |
| <i>c</i> (Å)                                                                   | 16.5332(5)                                                                                        |
| $\alpha$ (°)                                                                   | 65.510(3)                                                                                         |
| $\beta$ (°)                                                                    | 87.862(2)                                                                                         |
| $\gamma$ (°)                                                                   | 66.596(3)                                                                                         |
| <i>V</i> (Å <sup>3</sup> )                                                     | 3084.36(18)                                                                                       |
| <i>Z</i>                                                                       | 1                                                                                                 |
| <i>D<sub>c</sub></i> / (g·cm <sup>-3</sup> )                                   | 1.682                                                                                             |
| Radiation                                                                      | Cu K $\alpha$ ( $\lambda$ = 1.54184 Å)                                                            |
| Theta (°) range                                                                | 2.972 to 64.810                                                                                   |
| Index ranges                                                                   | -13 ≤ <i>h</i> ≤ 17, -15 ≤ <i>k</i> ≤ 17, -19 ≤ <i>l</i> ≤ 19                                     |
| Refls. Total                                                                   | 10185                                                                                             |
| restraints                                                                     | 0                                                                                                 |
| parameters                                                                     | 730                                                                                               |
| <i>R</i> <sub>1</sub> / <i>wR</i> <sub>2</sub><br>[ <i>I</i> > 2σ( <i>I</i> )] | 0.0727/0.2143                                                                                     |
| <i>R</i> <sub>1</sub> / <i>wR</i> <sub>2</sub><br>(all data)                   | 0.0836/0.2195                                                                                     |
| completeness                                                                   | 99.79                                                                                             |
| Goof                                                                           | 1.094                                                                                             |

**Table S2.** Crystallographic data of Cu<sub>14</sub>-2.

|                                                                                |                                                                                                                   |
|--------------------------------------------------------------------------------|-------------------------------------------------------------------------------------------------------------------|
| identification code                                                            | Cu <sub>14</sub> -2                                                                                               |
| formula                                                                        | C <sub>164</sub> H <sub>180</sub> Cl <sub>12</sub> Cu <sub>14</sub> N <sub>6</sub> O <sub>12</sub> S <sub>8</sub> |
| formula weight                                                                 | 3998.57                                                                                                           |
| Temperature/K                                                                  | 100.01(10)                                                                                                        |
| crystal system                                                                 | trigonal                                                                                                          |
| space group                                                                    | <i>R</i> 3                                                                                                        |
| <i>a</i> (Å)                                                                   | 20.1767(4)                                                                                                        |
| <i>b</i> (Å)                                                                   | 20.1767(4)                                                                                                        |
| <i>c</i> (Å)                                                                   | 59.918(2)                                                                                                         |
| $\alpha$ (°)                                                                   | 90                                                                                                                |
| $\beta$ (°)                                                                    | 90                                                                                                                |
| $\gamma$ (°)                                                                   | 120                                                                                                               |
| <i>V</i> (Å <sup>3</sup> )                                                     | 21124.4(11)                                                                                                       |
| <i>Z</i>                                                                       | 3                                                                                                                 |
| <i>D<sub>c</sub></i> / (g·cm <sup>-3</sup> )                                   | 1.598                                                                                                             |
| Radiation                                                                      | Cu K $\alpha$ ( $\lambda$ = 1.54184 Å)                                                                            |
| Theta (°) range                                                                | 2.6760 to 64.7760                                                                                                 |
| Index ranges                                                                   | -13 ≤ <i>h</i> ≤ 17, -32 ≤ <i>k</i> ≤ 32, -23 ≤ <i>l</i> ≤ 23                                                     |
| Refls. Total                                                                   | 13957                                                                                                             |
| restraints                                                                     | 84                                                                                                                |
| parameters                                                                     | 952                                                                                                               |
| <i>R</i> <sub>1</sub> / <i>wR</i> <sub>2</sub><br>[ <i>I</i> > 2σ( <i>I</i> )] | 0.0708/0.1838                                                                                                     |
| <i>R</i> <sub>1</sub> / <i>wR</i> <sub>2</sub><br>(all data)                   | 0.0856/0.1958                                                                                                     |
| completeness                                                                   | 99.94                                                                                                             |
| Goof                                                                           | 1.067                                                                                                             |



**Table S3.** Comparison of average bond lengths (Å) of Cu<sub>14</sub>-1 and Cu<sub>14</sub>-2.

| Entries             | Cu-Cu  | Cu-O  | Cu-S   |
|---------------------|--------|-------|--------|
| Cu <sub>14</sub> -1 | 2.7557 | 1.955 | 2.2886 |
| Cu <sub>14</sub> -2 | 2.7202 | 1.962 | 2.2898 |

**Table S4.** Selected bond lengths (Å) for cluster Cu<sub>14</sub>-1.

| Parameter | value      | Parameter | value      |
|-----------|------------|-----------|------------|
| Cu01-Cu02 | 2.6688(13) | Cu04-Cu06 | 2.7625(14) |
| Cu01-Cu03 | 2.7254(13) | Cu04-S008 | 2.4753(19) |
| Cu01-Cu04 | 2.6984(13) | Cu04-S009 | 2.6479(19) |
| Cu01-Cu04 | 2.7638(13) | Cu04-S00A | 2.2894(19) |
| Cu01-S008 | 2.1808(17) | Cu04-O00E | 2.042(5)   |
| Cu01-S009 | 2.1712(18) | Cu05-S00B | 2.138(2)   |
| Cu02-Cu07 | 2.7264(14) | Cu05-O00I | 1.863(5)   |
| Cu02-S008 | 2.2546(18) | Cu06-S008 | 2.3688(18) |
| Cu02-S00A | 2.2380(19) | Cu06-S009 | 2.3376(19) |
| Cu02-O00H | 1.988(5)   | Cu06-S00B | 2.284(2)   |
| Cu03-Cu05 | 2.7522(14) | Cu06-O00F | 1.971(5)   |
| Cu03-S009 | 2.2624(18) | Cu07-S00B | 2.144(2)   |
| Cu03-S00A | 2.2477(19) | Cu07-O00J | 1.879(6)   |

**Table S5.** Selected bond lengths (Å) for cluster Cu<sub>14</sub>-2.

| Parameter | value      | Parameter | value      |
|-----------|------------|-----------|------------|
| Cu01-Cu02 | 2.6094(12) | Cu04-S00B | 2.1486(17) |
| Cu01-Cu03 | 2.6533(12) | Cu04-O00J | 1.876(4)   |
| Cu01-Cu06 | 2.6238(11) | Cu05-Cu06 | 2.7700(13) |
| Cu01-Cu06 | 2.8163(12) | Cu05-S009 | 2.4193(16) |
| Cu01-S009 | 2.1901(16) | Cu05-S00A | 2.3454(16) |
| Cu01-S00A | 2.1778(16) | Cu05-S00B | 2.3028(18) |
| Cu02-Cu04 | 2.7475(12) | Cu05-O00L | 1.998(4)   |
| Cu02-S008 | 2.2244(16) | Cu06-S008 | 2.2879(17) |
| Cu02-S009 | 2.2489(16) | Cu06-S009 | 2.5343(17) |
| Cu02-O00I | 2.001(4)   | Cu06-S00A | 2.5726(17) |
| Cu03-Cu07 | 2.6991(13) | Cu06-O00K | 2.026(4)   |
| Cu03-S008 | 2.2077(16) | Cu07-S00B | 2.1512(19) |
| Cu03-S00A | 2.2466(17) | Cu07-O00N | 1.889(5)   |

## Reference

1. CrysAlisPro Version 1.171.35.19. (2013). Agilent Technologies Inc. Oxfordshire, OX5 1QU, UK.
2. G. M. Sheldrick, *Acta Cryst. A* **2015**, 71, 3-8.
3. G. M. Sheldrick, *Acta Cryst. A* **2008**, 64, 112-122.
4. O. V. Dolomanov, L. J. Bourhis, R. J. Gildea, J. A. K. Howard, H. Puschmann, *J. Appl. Cryst.* **2009**, 42, 339-341.
5. C. B. Hubschle, G. M. Sheldrick, B. Dittrich, *J. Appl. Cryst.* **2011**, 44, 1281-1284.
